# Supplementary material for: A Novel Preoperative Prediction Model Based on Deep Learning to Predict Neoplasm T Staging and Grading in Patients with Upper Tract Urothelial Carcinoma
Source: MDPI journal article supplement (doi:10.3390/jcm11195815), 2022-09-30
Supplement: s1 [file s1]

## Supplementary Materials

**Table S1. Features selection to construct models.** BMI, body mass index; UBC, urothelial bladder carcinoma; AA, aristolochic acid; CKD, chronic kidney disease; CT, computed tomography.

| Features for Model's Construction Base on Preoperative Information |                                                                                                                                                                                                                                                                                                         |
|--------------------------------------------------------------------|---------------------------------------------------------------------------------------------------------------------------------------------------------------------------------------------------------------------------------------------------------------------------------------------------------|
| General information                                                | Sex, Age, BMI                                                                                                                                                                                                                                                                                           |
| Past history                                                       | History of UBC, History of AA medication, History of nonurinary tumour, Diabetes, Hypertension, Coronary artery disease                                                                                                                                                                                 |
| Personal history                                                   | Smoking, Drinking                                                                                                                                                                                                                                                                                       |
| Hematology tests                                                   | White blood cells, Red blood cells, Platelet, Neutrophils, Lymphocytes, Neutrophils-lymphocytes ratio, Eosinophils, Basophils, ABO blood type, Rh blood type                                                                                                                                            |
| Coagulation tests                                                  | Prothrombin Time, Activated partial thromboplastin time                                                                                                                                                                                                                                                 |
| Biochemical examination                                            | Alanine aminotransferase, Aspartate aminotransferase, Total protein, Albumin, Prealbumin, Creatinine, Glomerular filtration rate, Stage of CKD, Sodium, Globulin, Triglycerides, Total cholesterol, High-density lipoprotein, Low-density lipoprotein,                                                  |
| Auxiliary examinations                                             | Cystoscopy (positive or negative), Ureteroscopy (positive or negative), Urine cytology (international standard of PAP classification), Tumour site (left or right), Tumour location (renal pelvis or ureter), Maximum Tumour diameter (Measurement by CT images), Hydronephrosis (positive or negative) |

**Table S2. Comparison of basic characteristics between training set and test set.** BMI, body mass index; IQR, interquartile range. UBC, urothelial bladder carcinoma; PUNLMP, papillary urothelial neoplasm of low malignant potential.

| Variables                             | Training set      | Test set          | $\chi^2/T$ | <i>P</i> |
|---------------------------------------|-------------------|-------------------|------------|----------|
|                                       | No. Pts (%)       | No. Pts (%)       |            |          |
| Total                                 | 707               | 177               |            |          |
| Gender                                |                   |                   |            |          |
| Male                                  | 313 (44.3)        | 82 (46.3)         | 0.242      | 0.623    |
| Female                                | 394 (55.7)        | 95 (53.7)         |            |          |
| Age, median (IQR)                     | 69 (74,69)        | 70 (62,75)        | 1.430      | 0.153    |
| BMI, kg.m <sup>2</sup> , median (IQR) | 23.9 (21.9, 26.2) | 23.6 (20.6, 26.2) | -1.815     | 0.070    |
| Previous bladder tumour               |                   |                   |            |          |
| No                                    | 666 (94.2)        | 167 (94.4)        | 0.006      | 0.939    |
| Yes                                   | 41 (5.8)          | 10 (5.6)          |            |          |
| Smoking                               |                   |                   |            |          |
| No                                    | 599 (84.7)        | 144 (81.4)        | 1.198      | 0.274    |
| Yes                                   | 108 (15.3)        | 33 (18.6)         |            |          |
| Hydronephrosis                        |                   |                   |            |          |
| No                                    | 287 (40.6)        | 62 (35.0)         | 1.835      | 0.175    |
| Yes                                   | 420 (59.4)        | 115 (65.0)        |            |          |
| Tumour site                           |                   |                   |            |          |
| Left                                  | 356 (50.4)        | 94 (53.1)         | 0.430      | 0.512    |
| Right                                 | 351 (49.6)        | 83 (46.9)         |            |          |
| Tumour location                       |                   |                   |            |          |

|                                       |                |                |       |       |
|---------------------------------------|----------------|----------------|-------|-------|
| Renal pelvis                          | 399 (56.4)     | 91 (51.4)      | 1.446 | 0.229 |
| Ureter                                | 308 (43.6)     | 86 (48.6)      |       |       |
| Tumour diameter (cm),<br>median (IQR) | 3.1 (2.1, 4.5) | 3.3 (2.0, 5.1) | 1.648 | 0.100 |
| Pathological T stage                  |                |                |       |       |
| Ta                                    | 19 (2.7)       | 5 (2.8)        | 0.002 | 0.969 |
| T1                                    | 244 (34.5)     | 58 (32.8)      |       |       |
| T2                                    | 235 (33.2)     | 64 (36.2)      |       |       |
| T3                                    | 194 (27.4)     | 46 (26.0)      |       |       |
| T4                                    | 15 (2.1)       | 4 (2.2)        |       |       |
| WHO 1973 grade                        |                |                |       |       |
| G1                                    | 19 (2.6)       | 6 (3.4)        | 0.527 | 0.468 |
| G2                                    | 394 (55.7)     | 102 (57.6)     |       |       |
| G3                                    | 294 (41.6)     | 69 (39.0)      |       |       |
| WHO 2004 grade                        |                |                |       |       |
| PUNLMP                                | 2 (0.3)        | 1 (0.6)        | 3.355 | 0.067 |
| Low grade                             | 171 (24.2)     | 54 (30.5)      |       |       |
| High grade                            | 534 (75.5)     | 122 (68.9)     |       |       |
